# Supplementary material for: Metabolic Factors Mediate the Association Between Serum Uric Acid to Serum Creatinine Ratio and Cardiovascular Disease
Source: PubMed Central journal article supplement — J Am Heart Assoc. 2021 Nov 15;10(23):e023054. doi: 10.1161/JAHA.121.023054 (PMC9075399; doi:10.1161/jaha.121.023054), 2021-11-15
Supplement: JAH3-10-e023054-s001.pdf [file JAH3-10-e023054-s001.pdf]

# **Supplemental Material**

**Table S1. Association of SUA/SCR, SUA, and SCr with risk of CVD.**

| Exposure | Q1        | Q2              | Q3              | Q4              |
|----------|-----------|-----------------|-----------------|-----------------|
| SUA/SCR  | Reference | 1.01(0.94-1.08) | 1.11(1.03-1.19) | 1.15(1.07-1.23) |
| SUA      | Reference | 0.97(0.90-1.05) | 1.03(0.95-1.11) | 1.10(0.98-1.19) |
| SCr      | Reference | 1.02(0.95-1.10) | 0.95(0.89-1.08) | 0.90(0.84-1.03) |

SUA, serum uric acid; SCr, serum creatinine; SUA/SCR: serum uric acid to serum creatinine ratio.

Adjusted for age, sex, body mass index, education, income, smoke, drink, physical activity, hypertension, diabetes, dyslipidemia, proteinuria, diuretics, angiotensin converting enzyme inhibitors/angiotensin II receptor blockers treatment, systolic blood pressure, diastolic blood pressure, fasting blood glucose, total cholesterol, and high sensitivity C-reactive protein.

**Table S2. Sensitivity analysis with competing risk model considering death as a competing risk.**

| Outcomes               | Quartiles of SUA/SCr |                 |                 |                 | <i>P</i> for trend |
|------------------------|----------------------|-----------------|-----------------|-----------------|--------------------|
|                        | Q1                   | Q2              | Q3              | Q4              |                    |
| Cardiovascular disease | Reference            | 1.02(0.94-1.10) | 1.12(1.04-1.20) | 1.15(1.07-1.24) | <0.0001            |
| Stroke                 | Reference            | 1.02(0.94-1.10) | 1.10(1.02-1.20) | 1.17(1.08-1.27) | <0.0001            |
| Ischemic stroke        | Reference            | 1.01(0.92-1.10) | 1.10(1.00-1.20) | 1.12(1.03-1.23) | 0.0030             |
| Hemorrhagic stroke     | Reference            | 1.09(0.89-1.33) | 1.19(0.97-1.46) | 1.36(1.12-1.66) | 0.0013             |
| Myocardial infarction  | Reference            | 1.02(0.88-1.20) | 1.17(1.00-1.36) | 1.08(0.92-1.26) | 0.1766             |

SUA/SCr, serum uric acid to serum creatinine ratio.

Adjusted for age, sex, body mass index, education, income, smoke, drink, physical activity, hypertension, diabetes, dyslipidemia, proteinuria, diuretics, angiotensin converting enzyme inhibitors/angiotensin II receptor blockers treatment, systolic blood pressure, diastolic blood pressure, fasting blood glucose, total cholesterol, and high sensitivity C-reactive protein.

**Table S3. Sensitivity analysis excluding outcome events within the first year of follow-up (N=1500).**

| Outcomes               | Quartiles of SUA/SCr |                 |                 |                 | <i>P</i> for trend |
|------------------------|----------------------|-----------------|-----------------|-----------------|--------------------|
|                        | Q1                   | Q2              | Q3              | Q4              |                    |
| Cardiovascular disease | Reference            | 1.02(0.94-1.10) | 1.13(1.04-1.22) | 1.16(1.08-1.26) | <0.000             |
| Stroke                 | Reference            | 1.02(0.93-1.11) | 1.11(1.02-1.22) | 1.18(1.08-1.29) | <0.000             |
| Ischemic stroke        | Reference            | 1.01(0.92-1.11) | 1.11(1.01-1.23) | 1.14(1.04-1.26) | 0.0014             |
| Hemorrhagic stroke     | Reference            | 1.05(0.83-1.34) | 1.18(0.93-1.50) | 1.38(1.10-1.74) | 0.0036             |
| Myocardial infarction  | Reference            | 1.02(0.86-1.21) | 1.18(1.00-1.39) | 1.11(0.94-1.31) | 0.1066             |

SUA/SCr, serum uric acid to serum creatinine ratio.

Adjusted for age, sex, body mass index, education, income, smoke, drink, physical activity, hypertension, diabetes, dyslipidemia, proteinuria, diuretics, angiotensin converting enzyme inhibitors/angiotensin II receptor blockers treatment, systolic blood pressure, diastolic blood pressure, fasting blood glucose, total cholesterol, and high sensitivity C-reactive protein.

**Table S4. Direct and indirect effects of SUA/SCr on the risk of CVD and the proportion mediated by cardio-metabolic factors.**

| Potential mediators | Direct effect         |          | Indirect effect            |          | Proportion mediated (%) |
|---------------------|-----------------------|----------|----------------------------|----------|-------------------------|
|                     | $B_{dir}$ , (95% CI)  | <i>P</i> | $\beta_{indir}$ , (95% CI) | <i>P</i> |                         |
| TG                  | 0.0042(0.0006-0.0078) | 0.0027   | 0.0019(0.0002-0.0022)      | <0.0001  | 30.74                   |
| TC                  | 0.0051(0.0015-0.0087) | 0.0051   | 0.0009(0.0007-0.0011)      | <0.0001  | 15.06                   |
| BMI                 | 0.0049(0.0013-0.0084) | 0.0079   | 0.0012(0.0.0009-0.0014)    | <0.0001  | 19.52                   |
| DBP                 | 0.0053(0.0025-0.0096) | 0.0002   | 0.0007(0.0004-0.0010)      | <0.0001  | 11.75                   |
| hs-CRP              | 0.0053(0.0017-0.0089) | 0.0041   | 0.0008(0.0006-0.0010)      | <0.0001  | 13.06                   |
| FBG                 | 0.0070(0.0035-0.0106) | 0.0001   | -0.0010(-0.0012--0.0007)   | <0.0001  | -16.38                  |
| SBP                 | 0.0059(0.0027-0.0099) | 0.0005   | 0.0002(-0.0001-0.0006)     | 0.1562   | --                      |
| LDL-C               | 0.0058(0.0026-0.0098) | 0.0007   | 0.0003(-0.0002-0.0005)     | <0.0651  | --                      |
| HDL-C               | 0.0060(0.0024-0.0096) | 0.0010   | 0.0001(-0.0003-0.0006)     | 0.5894   | --                      |

BMI, body mass index; CI, confidence interval; CVD, cardiovascular disease; DBP, diabolic blood pressure; FBG, fasting blood glucose; TC,

total cholesterol; TG, triglyceride; HDL-C, high density lipoprotein cholesterol; hs-CRP, high sensitivity C-reactive protein; LDL-C, low density lipoprotein cholesterol; SBP, systolic blood pressure.

Total effect was 0.0061(95% CI, 0.0025-0.0096;  $P=0.0010$ ).

Adjusted for age, sex, education, income, smoking status, drinking status, and physical activity.

**Figure S1. The flowchart of the study.**

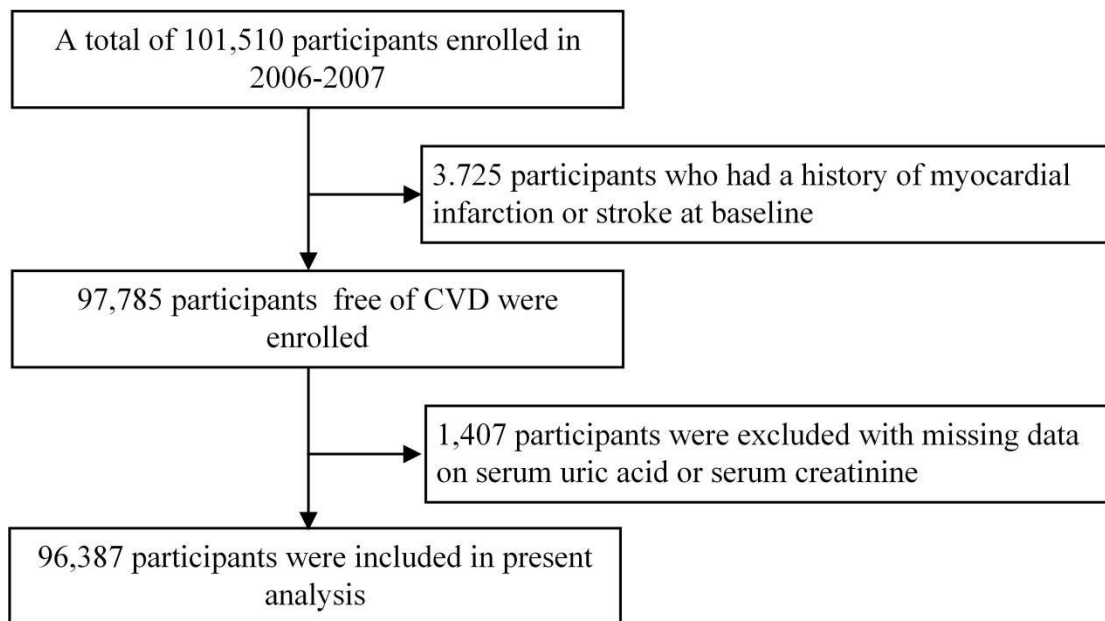

CVD, cardiovascular disease.
